# Supplementary material
Source: Springer Nature journal article supplement (https://www.springermedizin.de/resource/supplementary/12879_2012_2173_MOESM3_ESM.pdf/9443854)

**Patient 1:**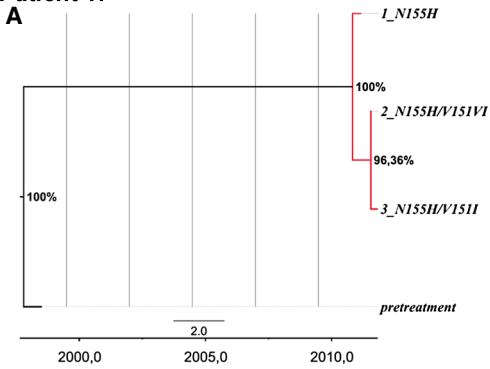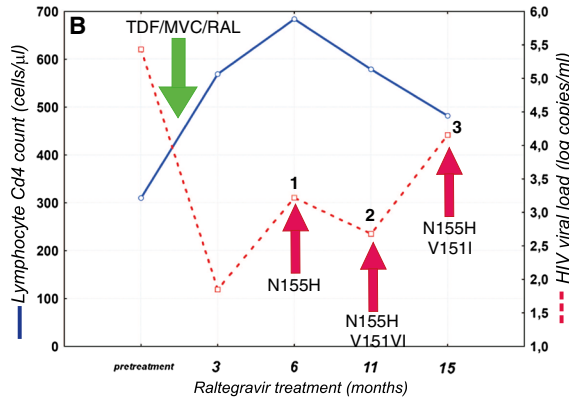**Patient 2:**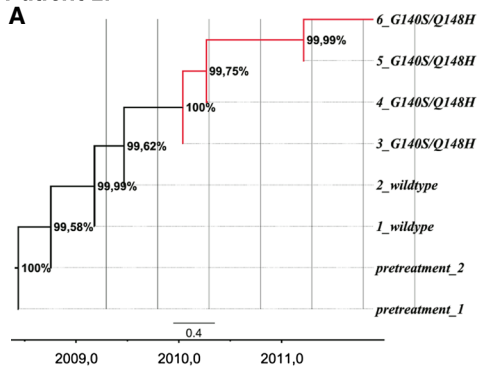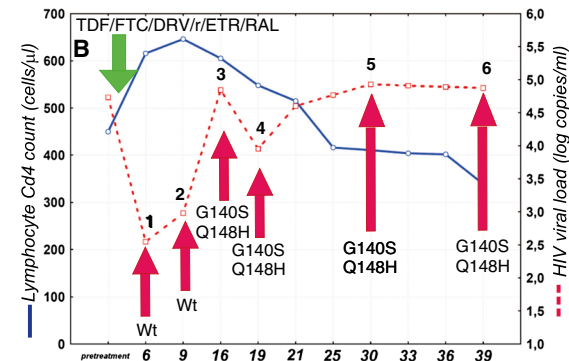**Patient 3:**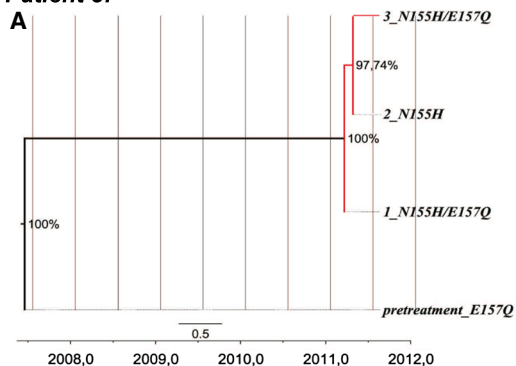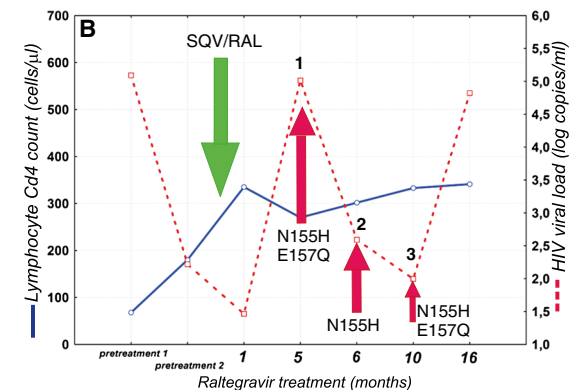**Patient 4:**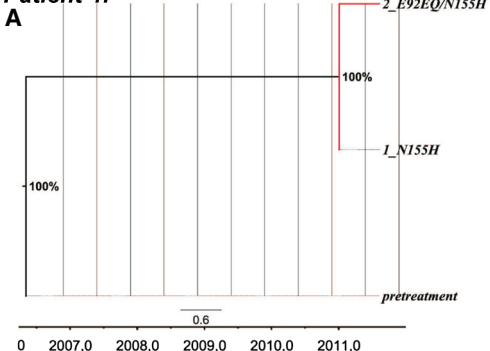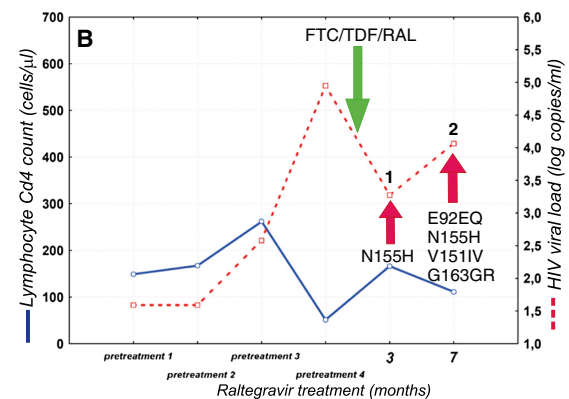

Supplement: MOESM3 [file 9443854]
